---

1 Key Promoter Region of *Wnt4* response to FSH and Genetic Effect on Several Production Traits of Its  
2 Mutations in Chicken

3 Conghao Zhong<sup>1#</sup>, Yiya Wang<sup>2#</sup>, Cuiping Liu<sup>3</sup>, Yunliang Jiang<sup>1</sup>, Li Kang<sup>1\*</sup>

4 <sup>1</sup>Shandong Provincial Key Laboratory of Animal Biotechnology and Disease Control and Prevention,  
5 College of Animal Science and Veterinary Medicine, Shandong Agricultural University, Tai'an, China.

6 <sup>2</sup>College of Life Science, Qilu Normal University, Jinan, China.

7 <sup>3</sup>Zhangxing animal husbandry and veterinary station, Zhaoyuan City, China

8 \*Correspondence: [likang916@sdau.edu.cn](mailto:likang916@sdau.edu.cn)

9 #These authors have contributed equally to this work.

10 **Corresponding author:**

11 Li Kang, Ph. D and Professor

12 E-mail: [likang916@sdau.edu.cn](mailto:likang916@sdau.edu.cn)

13 Contacting information: College of Animal Science and Veterinary Medicine, Shandong Agricultural

14 University, No. 61 Daizong street, Taian 271018, China

15 Tel: +86-538-8241593

16 Fax: +86-538-8241419

17

18

19

20

21

22

---

23 **Abstract**

24 The signaling pathway of the wingless-type mouse mammary tumor virus integration site (Wnt) plays  
25 an important role in ovarian and follicular development. *Wnt4* was shown in our previous study to be  
26 involved in the selection and development of chicken follicles by up-regulating the expression of follicle  
27 stimulating hormone receptors (*FSHR*), stimulating the proliferation of follicular granulosa cells and  
28 increasing the secretion of steroidal hormones. To further characterize cis-elements regulating chicken  
29 *Wnt4* transcription, in this study we determined critical regulatory regions affecting chicken *Wnt4*  
30 transcription, then identified a single nucleotide polymorphism (SNP) in this region, and finally analyzed  
31 the association of the SNP with chicken production traits. The results showed that the 5' regulatory region  
32 from -3354 to -2689 of the chicken *Wnt4* gene had the strongest activity and greatest response to FSH  
33 stimulation, and that one SNP site -3015 (G > C) in this segment was identified as affecting the binding of  
34 NFAT5 (nuclear factor of activated T cells 5). When G was replaced by C at this site, it eliminated the  
35 binding by NFAT5. Moreover, this locus was significantly associated with the keel length and comb  
36 length of hens. Individuals with the genotype CG had longer keels while those with genotype CC had  
37 longer combs. Collectively, these data suggested that the SNP-3015 (G > C) is (i) involved in the  
38 regulation of *Wnt4* gene expression by affecting the binding of NFAT5, (ii) associated with chicken keel  
39 length and comb length, and (iii) is a potential DNA marker in the molecular breeding of chickens for egg  
40 laying.

41 Keywords: chicken, *Wnt4*, SNP, FSH, production traits

42 **1. INTRODUCTION**

---

43 As a conservative signaling pathway, Wnt signaling regulates multiple developmental processes and  
44 occurrences of disease, such as stem cell self-renewal, cell proliferation, cell fate determination and early  
45 embryonic development and differentiation (Waghmare and Page-McCaw, 2018; Komiya and Habas,  
46 2008; Cadigan and Nusse, 1997). The Wnt family members are a class of secreted glycoprotein signaling  
47 molecules with localized action, which are generally used as ligands to participate in signal transduction.  
48 There are 15 or even more receptors or co-receptors, such as the Frizzled (Fzd) protein family, that are  
49 recognized and bound by Wnt ligands (van Amerongen and Nusse, 2009; Niehrs, 2012). Two signaling  
50 pathways -  $\beta$ -catenin-dependent (canonical) and  $\beta$ -catenin-independent (non-canonical) - are used by Wnt  
51 ligands (Schwarz-Romond, 2012, van Amerongen et al., 2008).

52 Some Wnts and their homologous receptor components are expressed in postnatal ovaries but their role  
53 in ovarian physiology is still unclear. *Wnt4* plays an important regulatory function in adult ovarian  
54 follicles. Overexpression of *Wnt4* in granulosa cells of eCG-treated mice up-regulates the expression of  
55  $\beta$ -catenin and key genes *CYP11A1*, *CYP19A1* and *StAR* in the synthesis of gonadal steroid hormones  
56 (Boyer et al., 2010). In chicken, *Wnt4* affects the growth, differentiation and development of the oviduct  
57 (Lim et al., 2013), and is mainly expressed in the shell glands and isthmus of the chicken oviduct,  
58 regulated by estrogen (Dougherty and Sanders, 2005). Our previous study revealed that the expression of  
59 *Wnt4* was the highest in the granulosa cells of small yellow follicles in chickens and declined in  
60 hierarchal follicles, and that *Wnt4* up-regulates the expression of *FSHR* and down-regulates the  
61 expression of *AMH* and *OCN*, promotes the expression of *StAR* and *CYP11A1*, and stimulates the  
62 proliferation of granulosa cells (Wang et al., 2017).

63 In the current study, the regulatory mechanism of chicken *Wnt4* transcription was further investigated.

---

64 The critical regulatory cis-elements responsible for *Wnt4* transcription that are also responsive to FSH  
65 treatment were first determined. Two single nucleotide polymorphisms (SNPs) in the 5' regulatory region  
66 of the chicken *Wnt4* gene were identified, and their associations with production traits in hens were  
67 analyzed. Finally, the mechanism of the SNP that is associated with keel length and comb length was  
68 analyzed.

## 69 **2. MATERIALS AND METHODS**

### 70 **2.1 Animals and Sample Collections**

71 Three breeds of Hy-line brown hens, Jining Bairi hens and Sunzhi hens with different production  
72 performances were used in this study. Hens were randomly selected from the local farm affiliated with  
73 Shandong Agricultural University. The egg laying traits of the Jining Bairi population were recorded  
74 individually for association analysis. All chickens had free access to water and feed. The chickens were  
75 housed in separate cages with a daily light period of 16 h, and egg laying was monitored to determine the  
76 timing and regularity of laying. Genomic DNA was extracted from blood samples collected from the wing  
77 vein using a DNA extraction mini kit (Tiangen Biotech, Beijing, China). All sampled hens were killed by  
78 cervical dislocation immediately after oviposition and the abdominal cavity was opened. Preovulatory  
79 follicles were carefully collected from laying hens and placed in phosphate-buffered saline (PBS) with 1%  
80 penicillin/streptomycin for cell culture. All of the animal experiments were approved by the Institutional  
81 Animal Care and Use Ethics Committee of Shandong Agricultural University and performed in  
82 accordance with the "Guidelines for Experimental Animals" of the Ministry of Science and Technology of  
83 China.

### 84 **2.2 Cell Culture**

---

85 The hierarchical follicles were isolated from egg-laying hens and placed in PBS. The yolks of the  
86 follicles were removed carefully with ophthalmic forceps. The granulosa cells (GCs) were isolated from  
87 the hierarchical follicles and then dispersed by treatment with 0.25% trypsin-EDTA (Gibco, Camarillo,  
88 CA, USA) at 37 °C for 10 min with gentle oscillation in a centrifuge tube. After centrifugation, the GCs  
89 were suspended in a culture medium (M199 with 10% fetal bovine serum and 1%  
90 penicillin/streptomycin), and subsequently seeded in 24-well culture plates at a density of  $1 \times 10^5$ /well. The  
91 number of cells was detected using Trypan blue. Cells were cultured at 38 °C in an atmosphere of  
92 water-saturated 5% CO<sub>2</sub> for 24 h.

### 93 **2.3 Construction of *Wnt4* Promoter Deletion Vectors and Site-directed mutation**

94 The region from -3354 to +252 bp in the 5'-regulatory region of the chicken *Wnt4* promoter and five  
95 promoter deletion fragments, -2689/+252, -1875/+252, -1188/+252, -535/+252, were amplified from hen  
96 genomic DNA, where +1 is the transcription initiation site. Five forward primers contain the KpnI site at  
97 the ends, and one reverse primer located downstream to the transcription start site contains the HindIII  
98 site at the ends (primer sequences are listed in Table 1). All PCR fragments were digested with KpnI and  
99 HindIII restriction enzymes and ligated with pGL3-Basic vector (Promega, Madison, WI, USA).

100 Two plasmids including the wild type (pGL3-G) and mutation type (pGL3-C) were constructed to  
101 assess the functionality of this transcription factor binding site in the *Wnt4* promoter. The primers for  
102 g.-3015(G > C) mutations were designed using the -3354 to -2689 region of the *Wnt4* gene promoter as  
103 the template (primer sequences are listed in Table 1). The PCR products were digested by DpnI  
104 Methylase, so the plasmid template to be mutated could be removed and the plasmid containing the  
105 mutation site could be retained.

---

## 106 **2.4 Cell Transfection and Luciferase Assay**

107 GCs were plated on 24-well plates for transient transfection experiments using Lipofectamine LTX  
108 and Plus Reagent (Invitrogen). The cells were transfected with pGL4.74 control vector (Promega,  
109 Madison, WI, USA ), and the five *Wnt4* luciferase plasmids differing in length (800 ng/well) along with  
110 recombinant FSH were added to the wells 6 h after transfection. In another experiment, the pGL4.74  
111 control vector (Promega, Madison, WI, USA), the wild-type plasmid and the mutation-type plasmid (800  
112 ng/well) were used to transfect cultured GC cells. Twenty-four hours after transfection, these cells were  
113 lysed for a luciferase activity assay.

114 Luciferase activity was measured using the Dual-Luciferase Reporter Assay System according to the  
115 manufacturer (Promega, Madison, WI, USA). The enzymatic activity of luciferase was measured with a  
116 luminometer (Modulus TM, Turner Biosystems). The individual values were averaged for each  
117 experiment, and the transfections were performed at least in triplicate. Empty pGL3-basic was used as the  
118 control. Luciferase activity was calculated by dividing the Firefly luciferase activity by the Renilla  
119 luciferase activity.

## 120 **2.5 SNP Identification, Polymorphism and Association Analysis**

121 Fifty individuals from Jining Bairi hens, Hy-line Brown hens, and Sunzhi hens were used as template  
122 for PCR amplification to the critical promoter region of *Wnt4* (-3353 to -2689), and then the  
123 amplifications were sequenced. The data, sequenced bidirectionally, were analyzed using the DNAMAN  
124 program (version 7.212, Lynnon Corp., Quebec, Canada) to determine the potential SNPs within these  
125 amplifications. Primer pairs amplified the -3353 to -2689 fragments (the primers are shown in Table 1).  
126 The genotypes at the -3015 SNP site were determined by Kompetitive Allele Specific PCR (KASP)

---

127 (Baygene Biotechnology Co., Shanghai, China) in the Jining Bairi population. The genotype and allele  
128 frequencies and Hardy-Weinberg equilibrium P-value were calculated using the Tools for Population  
129 Genetic Analyses software (<http://www.marksgeneticsoftware.net/tpga.htm>). The association of SNP  
130 with egg laying traits in the Jining Bairi population was analyzed using the following general model in  
131 SPSS (SPSS Inc., Chicago, IL, USA):  $Y_{ij} = \mu + G_i + e_{ij}$ , where  $Y_{ij}$  is the phenotypic value of traits,  $\mu$  is the  
132 population mean,  $G_i$  is the fixed effect of genotype, and  $e_{ij}$  is the random error effect.

### 133 **2.6 Electrophoretic Mobility Shift Assay (EMSA)**

134 The Genomatix software ([www.genomatix.de](http://www.genomatix.de)) was used to predict that the -3015 (G > C) may be the  
135 transcription factor binding sites of NFAT5, which regulates the transcription of Wnt4 by responding to  
136 FSH. HIH3T3 cells were seeded at a density of  $1 \times 10^6$  cells/mL and incubated in DMEM with 10% FBS  
137 at 37 °C for 72 h. The nuclear extracts prepared from the cells were incubated with biotin-labeled  
138 double-stranded oligonucleotides containing the consensus sequences for NFAT5 (5'  
139 -TTTATCCCAgGGAAACCTTCACAGTGCATTC-3') for an additional 4 h. GATA1 (5'  
140 CACTTGATAACAGAAAGTGATAACTCT-3') was used as a control. EMSA was performed using  
141 Non-Radioactive EMSA Kits with Biotin-Probes (Viagene, Tampa, FL, USA). The DNA-protein complex  
142 and unbound probe were electrophoresed on a 6% native polyacrylamide gel and visualized as per  
143 western blotting. The NFAT5 monoclonal antibody was used for the super shift, and standard NFAT5 was  
144 used as a positive control.

### 145 **2.7 Statistical Analyses**

146 The experiments were repeated a minimum of three times using tissues from different hens. All data are  
147 presented as the means  $\pm$  SEM. The differences between different groups were determined by one-way

---

148 ANOVA followed by Duncan's test in SPSS (SPSS Inc., Chicago, IL, USA). The differences between  
149 groups were considered statistically significant when  $P < 0.05$ .

### 150 **3. RESULTS**

#### 151 **3.1 Critical Region of *Wnt4* Gene response to FSH in Chicken GC Cells**

152 As the *Wnt4* gene is reported to play an essential role in follicle selection (Wang et al., 2017), we set  
153 out to analyze the mechanisms regulating its transcription. The luciferase activity assay on chicken  
154 preovulatory follicle GC cells transfected with different *Wnt4* promoter vectors (Table 1) showed that  
155 deletion from -3354 to -2689 greatly decreased relative luciferase activity, indicating positive regulatory  
156 elements exist in this region and that the region from -3354 to -2689 had the greatest response to FSH (10  
157 ng/mL) stimulation (Figure 1), suggesting cis-acting response elements to FSH exist to regulate chicken  
158 *Wnt4* transcription.

#### 159 **3.2 Polymorphisms in the Critical Promoter Region of the Chicken *Wnt4* Gene**

160 Sequence alignment between the promoter regions of the chicken *Wnt4* gene from Hy-line Brown,  
161 Jining Bairi and Sunzhi hens showed that the critical promoter region contains a SNP (G > C) at -3015  
162 (Figure 2A). The peak map of polymorphic sites was genotyped using Chromas software. This  
163 polymorphic site has three genotypes (Figure 2B), and the number distribution of different genotypes is  
164 shown in Figure 2C. According to the results of KASP, the genotype frequency and allele frequency of  
165 this SNP locus were calculated (Table 2). At this SNP site, allele G was predominant in the Jining Bairi  
166 chicken population.

#### 167 **3.3 Association of the SNP-3015 (G > C) of *Wnt4* Gene with Chicken Production Traits**

168 The statistical analysis is based on the genotype results of the Jining Bairi chicken population (n = 539)



---

169 with production records. The association between the genotype of each individual and the egg laying  
170 traits is shown in Table 3. The results indicate that chickens with genotype CG have a longer keel than  
171 chickens with the other genotypes ( $P < 0.05$ ) and that the CC individuals have a longer comb ( $P < 0.05$ ).  
172 There was no significant difference between genotypes for the other measured traits.

### 173 **3.4 Effect of the SNP-3015 (G > C) on Promoter Activity of the Chicken *Wnt4* Gene**

174 Luciferase reporter constructs of pGL3-G and pGL3-C were transiently transfected into GCs to assess  
175 whether the SNP could change the effect of *Wnt4* gene transcription. As shown in Figure 3, this SNP  
176 significantly affected the promoter activity - the promoter with allele G has higher luciferase activity than  
177 the promoter with allele C ( $P \leq 0.001$ ).

### 178 **3.5 SNP-3015 (G > C) Affects NFAT5 Binding in Chicken *Wnt4* Promoter**

179 Analysis with the Genomatix revealed that the SNP (G > C) at -3015 may affect the binding site of  
180 NFAT5, which may be related to the regulation of *Wnt4* responses to FSH. An electrophoretic mobility  
181 shift assay (EMSA) was performed to identify this transcription factor. As shown in Figure 5, binding to  
182 the oligo nucleotide (NFAT5) was detected when the SNP site was G (Figure 4A). The super shift assay  
183 with the NFAT5 monoclonal antibody appeared to correspond to the DNA-protein-antibody complex,  
184 which further demonstrated that the SNP (g.-3015) was located in the binding site of NFAT5 (Figure 4B).

## 185 **4. DISCUSSION**

186 Our previous work has proved that *Wnt4* plays an important role in ovarian follicle selection in  
187 chickens, and FSH treatment significantly increased the expression of *Wnt4* in GCs (Wang et al., 2017).  
188 In cows, the *Wnt4* signal can also enhance the stimulation of FSH during the follicular dominance phase  
189 (Gupta et al., 2014). These results suggest that there is interaction between *Wnt4* and FSH. However, the

---

190 molecular mechanism of the interaction between them has not been investigated. In our study, we found  
191 that the 5' regulatory region from -3354 to -2689 of *Wnt4* was the key regulatory region in response to  
192 FSH stimulation and affected chicken *Wnt4* gene transcription, which provides a reference for further  
193 elucidation of the regulatory relationship between *Wnt4* and FSH.

194 There are two studies showing that SNPs of the *Wnt4* gene can affect its expression and function. SNP  
195 rs7521902 in *Wnt4* is significantly correlated with the pathogenesis of endometriosis (Angioni et al.,  
196 2020), and rs2072920 in *Wnt4* is associated with body mass index (BMI) variations in the Han Chinese  
197 population (Dong et al., 2017). We identified the critical regions of the *Wnt4* promoter which contained a  
198 SNP -3015 (G > C) and we showed that SNP -3015 (G > C) in the *Wnt4* gene was significantly associated  
199 with keel length and comb length in chickens, the individuals with CG genotype having a longer keel  
200 length.

201 The Wnt pathway is involved in bone and cartilage homeostasis, controls the function of osteoblasts,  
202 and affects the differentiation of osteoblasts (Huang et al., 2019; Guo and Cooper, 2007; Li et al., 2019).  
203 A genome-wide association study revealed that polymorphisms of *Wnt4* were associated with bone  
204 mineral densities (Hendrickx et al., 2017), which is consistent with the result of our study. Keel bone  
205 health in laying hens is an important welfare problem in egg production systems. Keel bone damage  
206 (KBD) has adverse effects on welfare, health, production performance, and egg quality of the laying hens  
207 and is regulated by genetic factors (Eusemann et al., 2020). There is a strong association between egg  
208 production and keel bone fractures (KBF); the laying performance of KBF hens is 16.2% lower than that  
209 of non-fractured hens (Rufener, 2019). Although the relationship between keel length and KBF or KBD is  
210 still unclear, the length of keel affects the development of internal organs to a certain extent in domestic

---

211 chickens. Therefore, selective breeding may help to reduce the susceptibility of KBF (Stratmann et al.,  
212 2016; Kolakshyapati et al., 2019). The SNP -3015 (G > C) in the chicken *Wnt4* promoter is a useful  
213 molecular marker for breeding focused on improving the keel trait. Comb size is used as an important  
214 criterion for hen development and egg production (Folsch et al., 1994; Emily et al., 2011). In our study,  
215 we found that individuals with the CC genotype had a longer comb at the -3015 (G > C) mutation site,  
216 suggesting a potential marker for improving the comb trait.

217 The transcription factor prediction and EMSA experiment showed that the SNP-3015 (G > C) in this  
218 key regulatory region was the binding site of the transcription factor NFAT5. When this site is G, it has  
219 binding activity. In mice, NFAT5 can regulate the proliferation of granulosa cells by activating the Wnt  
220 signaling pathway (Tao et al., 2019). We suppose that the SNP -3015 (G > C) may regulate *Wnt4*  
221 expression through NFAT5 binding, in turn further affecting chicken follicle selection; this possibility  
222 requires further investigation.

223 In conclusion, SNP-3015 (G > C) in the *Wnt4* promoter region was regulated by NFAT5. The SNP was  
224 significantly associated with chicken keel and comb length. These data provide a reference for further  
225 elucidation of the relationship between the appearance of phenotypes such as keel length and comb length  
226 and reproductive capacity in chickens.

## 227 **ACKNOWLEDGEMENTS**

228 This study was funded by the National Natural Science Foundation of China (31672414, 31772588),  
229 Agricultural Breed Project of Shandong Province (2019LZGC019), and the Funds of Shandong “Double  
230 Tops” Program (SYL2017YSTD12).

## 231 **CONFLICT OF INTEREST**

---

232 The authors declare no conflict of interests for this article.

233 **REFERENCES**

- 234 Angioni, S., D'Alterio, M. N., Coiana, A., Anni, F., Gessa, S., & Deiana, D. (2020). Genetic  
235 Characterization of Endometriosis Patients: Review of the Literature and a Prospective Cohort Study  
236 on a Mediterranean Population. *Int J Mol Sci*, 21(5). doi:10.3390/ijms21051765
- 237 Boyer, A., Lapointe, E., Zheng, X., Cowan, R. G., Li, H., Quirk, S. M., . . . Boerboom, D. (2010). WNT4  
238 is required for normal ovarian follicle development and female fertility. *FASEB J*, 24(8), 3010-3025.  
239 doi:10.1096/fj.09-145789
- 240 Cadigan, K. M., & Nusse, R. (1997). Wnt signaling: a common theme in animal development. *Genes Dev*,  
241 11(24), 3286-3305. doi:10.1101/gad.11.24.3286
- 242 Dong, S. S., Hu, W. X., Yang, T. L., Chen, X. F., Yan, H., Chen, X. D., . . . Guo, Y. (2017). SNP-SNP  
243 interactions between WNT4 and WNT5A were associated with obesity related traits in Han Chinese  
244 Population. *Sci Rep*, 7, 43939. doi:10.1038/srep43939
- 245 Dougherty, D. C., & Sanders, M. M. (2005). Estrogen action: revitalization of the chick oviduct model.  
246 *Trends Endocrinol Metab*, 16(9), 414-419. doi:10.1016/j.tem.2005.09.001
- 247 Emily A. O'Connor, John E. Saunders, Hannah Grist, Morven A. McLeman & Siobhan M. (2011). The  
248 relationship between the comb and social behaviour in laying hens. *Abeyesinghe*, 135(4), 293-299.  
249 doi: 10.1016/j.applanim.2011.09.011
- 250 Eusemann, B. K., Patt, A., Schrader, L., Weigend, S., Thone-Reineke, C., & Petow, S. (2020). The Role of  
251 Egg Production in the Etiology of Keel Bone Damage in Laying Hens. *Front Vet Sci*, 7, 81.  
252 doi:10.3389/fvets.2020.00081

- 
- 253 Folsch, D. W., Sulzer, B., Meier, T., & Huber, H. U. (1994). [The effect of the husbandry system on comb  
254 size and comb color in hens]. *Tierarztl Prax*, 22(1), 47-54. Retrieved from  
255 <https://www.ncbi.nlm.nih.gov/pubmed/8165660>
- 256 Guo, J., & Cooper, L. F. (2007). Influence of an LRP5 cytoplasmic SNP on Wnt signaling and  
257 osteoblastic differentiation. *Bone*, 40(1), 57-67. doi:10.1016/j.bone.2006.07.016
- 258 Gupta, P. S., Folger, J. K., Rajput, S. K., Lv, L., Yao, J., Ireland, J. J., & Smith, G. W. (2014). Regulation  
259 and regulatory role of WNT signaling in potentiating FSH action during bovine dominant follicle  
260 selection. *PLoS One*, 9(6), e100201. doi:10.1371/journal.pone.0100201
- 261 Hendrickx, G., Boudin, E., Steenackers, E., Nielsen, T. L., Andersen, M., Brixen, K., & Van Hul, W.  
262 (2017). Genetic Screening of WNT4 and WNT5B in Two Populations with Deviating Bone Mineral  
263 Densities. *Calcif Tissue Int*, 100(3), 244-249. doi:10.1007/s00223-016-0213-8
- 264 Huang, Y., Jiang, L., Yang, H., Wu, L., Xu, N., Zhou, X., & Li, J. (2019). Variations of Wnt/beta-catenin  
265 pathway-related genes in susceptibility to knee osteoarthritis: A three-centre case-control study. *J Cell*  
266 *Mol Med*, 23(12), 8246-8257. doi:10.1111/jcmm.14696
- 267 Kolakshyapati, M., Flavel, R. J., Sibanda, T. Z., Schneider, D., Welch, M. C., & Ruhnke, I. (2019).  
268 Various bone parameters are positively correlated with hen body weight while range access has no  
269 beneficial effect on tibia health of free-range layers. *Poult Sci*, 98(12), 6241-6250.  
270 doi:10.3382/ps/pez487
- 271 Komiya, Y., & Habas, R. (2008). Wnt signal transduction pathways. *Organogenesis*, 4(2), 68-75.  
272 doi:10.4161/org.4.2.5851

- 
- 273 Li, X., Lu, Y., Liu, X., Xie, X., Wang, K., & Yu, D. (2019). Identification of chicken FSHR gene promoter  
274 and the correlations between polymorphisms and egg production in Chinese native hens. *Reprod*  
275 *Domest Anim*, 54(4), 702-711. doi:10.1111/rda.13412
- 276 Lim, C. H., Lim, W., Jeong, W., Lee, J. Y., Bae, S. M., Kim, J., . . . Song, G. (2013). Avian WNT4 in the  
277 female reproductive tracts: potential role of oviduct development and ovarian carcinogenesis. *PLoS*  
278 *One*, 8(7), e65935. doi:10.1371/journal.pone.0065935
- 279 Niehrs, C. (2012). The complex world of WNT receptor signalling. *Nat Rev Mol Cell Biol*, 13(12),  
280 767-779. doi:10.1038/nrm3470
- 281 Rufener, C., Baur, S., Stratmann, A., & Toscano, M. J. (2019). Keel bone fractures affect egg laying  
282 performance but not egg quality in laying hens housed in a commercial aviary system. *Poult Sci*, 98(4),  
283 1589-1600. doi:10.3382/ps/pey544
- 284 Schwarz-Romond, T. (2012). Three decades of Wnt signalling. *EMBO J*, 31(12), 2664.  
285 doi:10.1038/emboj.2012.159
- 286 Stratmann, A., Frohlich, E. K., Gebhardt-Henrich, S. G., Harlander-Matauschek, A., Wurbel, H., &  
287 Toscano, M. J. (2016). Genetic selection to increase bone strength affects prevalence of keel bone  
288 damage and egg parameters in commercially housed laying hens. *Poult Sci*, 95(5), 975-984.  
289 doi:10.3382/ps/pew026
- 290 Tao, H., Xiong, Q., Ji, Z., Zhang, F., Liu, Y., & Chen, M. (2019). NFAT5 is Regulated by p53/miR-27a  
291 Signal Axis and Promotes Mouse Ovarian Granulosa Cells Proliferation. *Int J Biol Sci*, 15(2), 287-297.  
292 doi:10.7150/ijbs.29273

- 
- 293 van Amerongen, R., Mikels, A., & Nusse, R. (2008). Alternative wnt signaling is initiated by distinct  
294 receptors. *Sci Signal*, *1*(35), re9. doi:10.1126/scisignal.135re9
- 295 van Amerongen, R., & Nusse, R. (2009). Towards an integrated view of Wnt signaling in development.  
296 *Development*, *136*(19), 3205-3214. doi:10.1242/dev.033910
- 297 Waghmare, I., & Page-McCaw, A. (2018). Wnt Signaling in Stem Cell Maintenance and Differentiation in  
298 the Drosophila Germarium. *Genes (Basel)*, *9*(3). doi:10.3390/genes9030127
- 299 Wang, Y., Chen, Q., Liu, Z., Guo, X., Du, Y., Yuan, Z., . . . Jiang, Y. (2017). Transcriptome Analysis on  
300 Single Small Yellow Follicles Reveals That Wnt4 Is Involved in Chicken Follicle Selection. *Front*  
301 *Endocrinol (Lausanne)*, *8*, 317. doi:10.3389/fendo.2017.00317

302 **FIGURE LEGENDS:**

- 303 FIGURE 1. Luciferase assay of effecting of FSH on *Wnt4* promoter activity in chicken GCs. The  
304 numbering refers to the transcription initiation site designated as +1. Each bar represents the means  $\pm$   
305 SEM. \*\*\* represent  $P \leq 0.001$
- 306 FIGURE 2. Polymorphisms in the critical promoter region of chicken *Wnt4* gene. (A) Sequencing  
307 alignment of SNP site in Hy-line Brown hens, Jining Bairi hens and Sunzhi hens and one SNP (g.-3015)  
308 was detected. (B) Genotyping of the SNP (g.-3015) site and three genotypes were showed. (C)  
309 Genotyping in Jining Bairi population (n = 539) by using the KASP method.
- 310 FIGURE 3. Effect of the SNP on chicken *Wnt4* gene transcriptional activity in GCs. It used the  
311 dual-luciferase report assay for verification of the effect of the SNP (g.-3015) different genotypes. Small  
312 letters on the error bar represent  $P \leq 0.05$

313 FIGURE 4. Electrophoretic mobility shift assay (EMSA) of the transcription factor binding sites at the  
314 SNP (g.-3015) in chicken *Wnt4* gene promoter. (A) EMSA analysis was conducted with biotin-labeled  
315 probe in the SNP (g.-3015). (B) Super shift assay with NFAT5 monoclonal antibody appeared to  
316 correspond to the DNA-protein-antibody complex.  
317  
318



319 TABLE 1 Primers used for plasmid construction of chicken *Wnt4* gene

| Primer name              | Primer Sequence (5'-3')              |
|--------------------------|--------------------------------------|
| pGL3-Wnt4(-3354+252) (F) | CGGGGTACCGCCTGGAGGTATAATAAGCA        |
| pGL3-Wnt4(-2689+252) (F) | CGGGGTACCTTAGGTGACGGCACAGCA          |
| pGL3-Wnt4(-1875+252) (F) | CGGGGTACCCCAGGGGCATCAGAAT            |
| pGL3-Wnt4(-1188+252) (F) | CGGGGTACCTGCGAGCAGGAAAATGGA          |
| pGL3-Wnt4(-535+252) (F)  | CGGGGTACCGTCTACCAGCAAGAGCAGG         |
| Pro-wnt4-1R2             | CCCAAGCTTAGAAGGTGGCGAGGATG           |
| wnt4-mut-F               | CACATTCCTTTATCCCACGGAAACCTTCACAGTGCA |
| wnt4-mut-R               | TGCACTGTGAAGGTTTCCGTGGGATAAAGGAATGTG |

320

321

322 TABLE 2 Genotype and allele frequencies at the SNP site of the *Wnt4* gene in the Jining Bairi chicken

| Site    | Breed (number)          | Genotype frequency |       |       | Allele frequency |       | HWE ( <i>P</i> -value) |
|---------|-------------------------|--------------------|-------|-------|------------------|-------|------------------------|
|         |                         | GG                 | CG    | CC    | G                | C     |                        |
| g.-3015 | Jining Bairi<br>(n=539) | 0.358              | 0.458 | 0.183 | 0.587            | 0.413 | 0.204                  |

323

324

325 TABLE 3 Associations of genotypes of the SNP on laying traits in the Jining Bairi chicken

| Site    | Traits | Genotype                   |                           |                           | <i>P</i> -value |
|---------|--------|----------------------------|---------------------------|---------------------------|-----------------|
|         |        | GG                         | CG                        | CC                        |                 |
| g.-3015 | AFE    | 149.763±0.411              | 150.518±0.409             | 150.235±0.764             | 0.473           |
|         | KLFE   | 10.693±0.056 <sup>ab</sup> | 10.734±0.048 <sup>a</sup> | 10.531±0.068 <sup>b</sup> | 0.024           |
|         | BWFE   | 1463.082±17.766            | 1476.105±10.399           | 1475.234±13.269           | 0.330           |
|         | E30    | 111.602±1.690              | 113.539±1.074             | 113.083±1.346             | 0.411           |
|         | E50    | 137.520±2.039              | 140.223±1.293             | 138.818±1.702             | 0.075           |
|         | CLFE   | 4.005±0.052 <sup>a</sup>   | 4.080±0.048 <sup>ab</sup> | 4.224±0.080 <sup>b</sup>  | 0.019           |

326

327

328

329

330

331

Note: AFE: age of first egg; KLFE: keel length at the age of first egg; BWFE: body weight at the age of first egg; E30: egg number at 30 weeks of age; E50: egg number at 50 weeks of age, CLFE: comb length at the age of first egg.

332

FIGURE 1

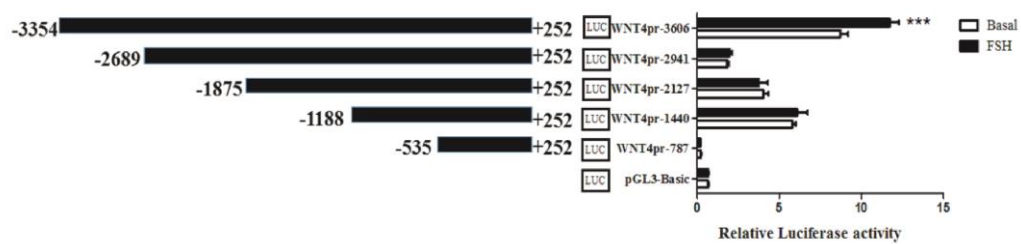

333

334

335

FIGURE 2

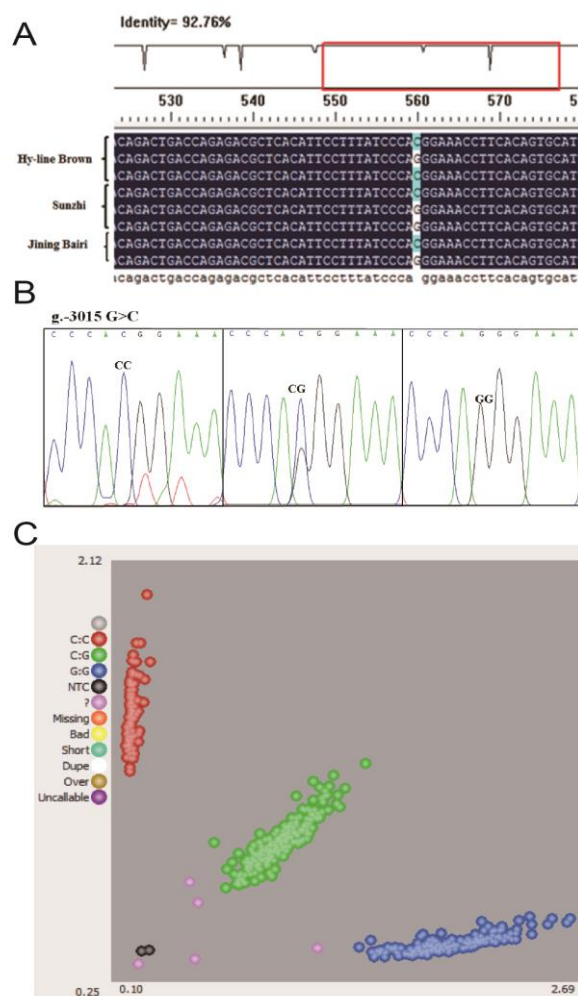

336

337

338

FIGURE 3

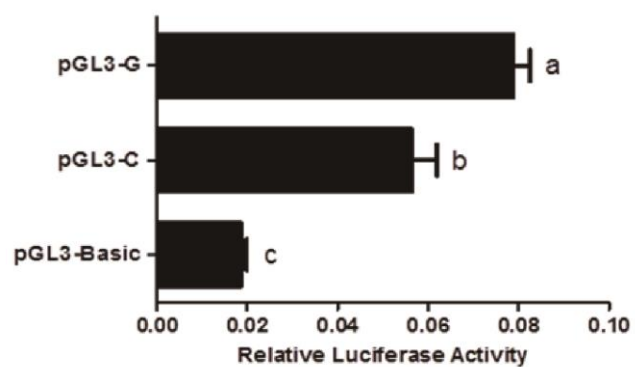

339

340

341

FIGURE 4

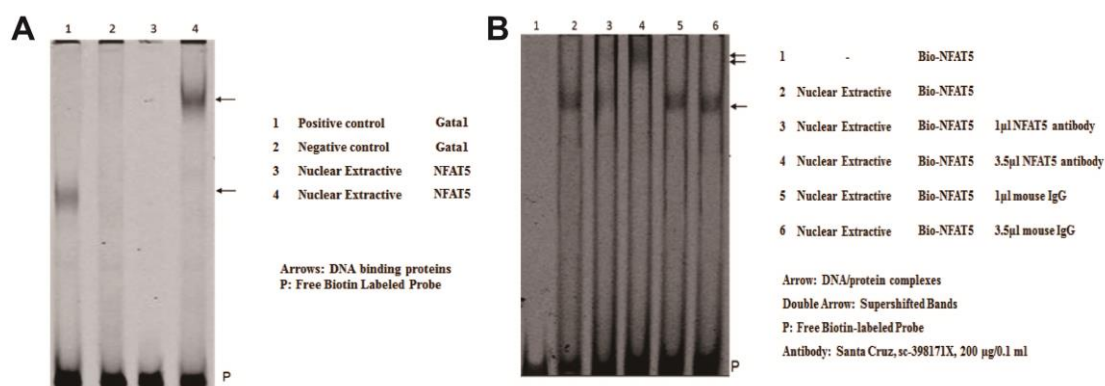

342
